# Supplementary material for: Comparison of High Hydrostatic Pressure, Ultrasound, and Heat Treatments on the Quality of Strawberry–Apple–Lemon Juice Blend
Source: MDPI journal article supplement (doi:10.3390/foods9020218), 2020-02-19
Supplement: s1 [file s1]

1    **Supplemental table captions**

2    **Table S1** Sensory attributes and reference scores used for sensory evaluation of juice blend.

3

4 **Table S1** Sensory attributes and reference scores used for sensory evaluation of juice blend.

| Sensory attributes |                                                                        | Reference scores |
|--------------------|------------------------------------------------------------------------|------------------|
| Taste              | Juice is moderately sweet and sour, even and delicate                  | 30~40            |
|                    | Juice is slightly sour or sweet, and a little grainy                   | 10~30            |
|                    | Juice is very sour or sweet, and very grainy                           | 0~10             |
| Aroma              | It has a rich blended flavor of strawberry, apple and lemon; no odor   | 20~30            |
|                    | It has some blended flavor of strawberry, apple and lemon; little odor | 10~20            |
|                    | It has no blended flavor of strawberry, apple and lemon; with odor     | 0~10             |
| Color              | The color is bright red and uniform                                    | 10~15            |
|                    | The color is light or dark red, and uneven                             | 5~10             |
|                    | The color is brown-red and uneven                                      | 0~5              |
| Consistency        | No precipitation or bubbles in juice, and uniform                      | 10~15            |
|                    | Some precipitation and bubbles in juice                                | 5~10             |
|                    | Much precipitation and many bubbles in juice, and uneven               | 0~5              |
